# Supplementary material
Source: publisher figshare collection journal article supplement (https://gsapubs.figshare.com/ndownloader/files/28228443)
Supplement: Supplementary file 1 [file 28228443]

## Sheet: S1A - Bulk assemblages
TABLE S1A. SAMPLE OVERVIEW OF M0077A BULK ASSEMBLAGES WITH ASSOCIATED ANALYTICAL TECHNIQUES THAT WERE USED
#	Sample ID	Depth (mbsf)	Lithological unit	Lab	Thin section ID	Thin section µXRF	Image analysis	Thick section µXRF	EMPA	Bulk ICP-OES & ICP-MS	Bulk XRF & INAA
1	40_1_28_30	616.52	Paleogene sediments	Brussels						X
2	40_1_30_32	616.54	Paleogene sediments	Brussels/College Station	TX_30-36AA	X		X
3	40_1_32_33	616.56	Green marlstone	Brussels				X
4	40_1_33_34	616.57	Green marlstone	Brussels				X
5	40_1_34_35	616.58	Green marlstone	Brussels				X
6	40_1_35_36	616.59	Transitional unit	Brussels				X
7	40_1_38_44	616.62	Transitional unit	Brussels				X		X
8	40_1_49_50	616.73	Transitional unit	Brussels				X		X
9	40_1_55_56	616.79	Transitional unit	Brussels				X
10	40_1_60_61	616.84	Transitional unit	Brussels				X
11	40_1_65_66	616.89	Transitional unit	Brussels				X
12	40_1_70_71	616.94	Transitional unit	Brussels				X
13	40_1_75_76	616.99	Transitional unit	Brussels				X
14	40_1_80_81	617.04	Transitional unit	Brussels				X		X
15	40_1_85_86	617.09	Transitional unit	Brussels				X
16	40_1_90_91	617.14	Transitional unit	Brussels				X
17	40_1_95_96	617.19	Transitional unit	Brussels				X
18	40_1_98_100	617.22	Transitional unit	College Station	TX_28A	X
19	40_1_99_100	617.23	Transitional unit	Brussels				X
20	40_1_104_105	617.28	Transitional unit	Brussels				X
21	40_1_106_110	617.3	Transitional unit	Brussels						X
22	40_1_110_118	617.34	Bedded suevite unit	College Station	TX_32BB	X
23	40_1_110_111	617.34	Bedded suevite unit	Brussels	PTS-01	X		X
24	40_1_111_113	617.35	Bedded suevite unit	Brussels				X		X
25	40_1_115_116	617.39	Bedded suevite unit	Brussels				X
26	40_1_118_129	617.42	Bedded suevite unit	College Station	TX_33BB & TX_33BC	X
27	40_1_119_120	617.43	Bedded suevite unit	Brussels				X
28	40_1_122_123.5	617.46	Bedded suevite unit	Brussels	PTS-02	X		X
29	40_1_134_136	617.58	Bedded suevite unit	Brussels	PTS-03	X		X
30	40_2_0_3	617.67	Bedded suevite unit	Brussels	BTS-01	X	X	X	X	X
31	40_2_50_53	618.17	Bedded suevite unit	Brussels	PTS-04	X		X
32	40_2_100_103	618.67	Bedded suevite unit	Brussels	BTS-02	X		X		X
33	40_2_107_109	618.74	Bedded suevite unit	Vienna				X			X
34	40_3_23.5_27.5	619.265	Bedded suevite unit	Brussels	PTS-05	X		X
35	41_1_54_56	619.83	Bedded suevite unit	Brussels	BTS-03	X		X
36	41_1_78_80	620.07	Bedded suevite unit	Brussels				X
37	41_1_105_109	620.34	Bedded suevite unit	Brussels	PTS-06	X		X
38	41_1_106_108	620.35	Bedded suevite unit	Vienna				X			X
39	41_1_135_137	620.64	Bedded suevite unit	Brussels				X
40	41_2_19_21	620.94	Graded suevite unit	Brussels	BTS-04	X		X
41	41_2_21_23.5	620.96	Graded suevite unit	Vienna				X			X
42	41_2_75_78.5	621.5	Graded suevite unit	Brussels	PTS-07	X		X
43	41_2_124_131	622.04	Graded suevite unit	Brussels	BTS-05	X		X
44	42_1_72_74	623.06	Graded suevite unit	Brussels	PTS-08	X		X
45	42_2_84_86	624.22	Graded suevite unit	Brussels	BTS-06	X		X
46	42_3_44_46	625.25	Graded suevite unit	Brussels	PTS-09	X		X
47	42_3_46_48.5	625.27	Graded suevite unit	Vienna				X			X
48	43_1_102_104	626.41	Graded suevite unit	Brussels	BTS-07	X		X
49	43_2_52_54	627.39	Graded suevite unit	Brussels	PTS-10	X		X
50	43_2_54_56.5	627.41	Graded suevite unit	Vienna				X			X
51	44_1_46_48	628.9	Graded suevite unit	Brussels	BTS-08	X		X		X
52	44_2_32_34	629.96	Graded suevite unit	Brussels	PTS-11	X		X
53	44_2_51_53	630.15	Graded suevite unit	Vienna				X			X
54	44_3_12_14	630.96	Graded suevite unit	Brussels	PTS-12	X		X
55	45_1_62_64	632.11	Graded suevite unit	Brussels	PTS-13	X		X
56	45_2_52_54	633.24	Graded suevite unit	Brussels	BTS-09	X		X
57	45_3_37_39	634.32	Graded suevite unit	Brussels	BTS-10	X		X
58	46_1_87_89	635.41	Graded suevite unit	Brussels	BTS-11	X		X
59	46_2_49_51.5	636.53	Graded suevite unit	Vienna				X			X
60	47_1_112_114	638.71	Graded suevite unit	Brussels	BTS-12	X		X
61	48_1_22_24	640.86	Graded suevite unit	Brussels	BTS-13	X	X	X	X	X
62	48_1_77_79.5	641.41	Graded suevite unit	Brussels				X
63	48_2_52_54	641.96	Graded suevite unit	Brussels				X
64	48_2_54_56.5	641.98	Graded suevite unit	Vienna				X			X
65	48_3_7_9	642.52	Graded suevite unit	Brussels				X
66	49_1_62_64	644.31	Graded suevite unit	Brussels				X
67	49_1_64_66.5	644.33	Graded suevite unit	Vienna	VTS-00			X			X
68	49_3_56_58	646.64	Graded suevite unit	Brussels	BTS-14	X		X
69	50_1_94_96.5	647.65	Graded suevite unit	Vienna				X			X
70	50_3_22_24	648.81	Graded suevite unit	Brussels	BTS-15	X		X
71	51_1_12_14	649.94	Graded suevite unit	Brussels	BTS-16	X		X		X
72	51_2_69_71.5	651.06	Graded suevite unit	Vienna				X			X
73	52_1_37_39.5	653.21	Graded suevite unit	Vienna				X			X
74	52_2_125_127	655.19	Graded suevite unit	Brussels	BTS-17	X		X
75	53_3_53_57	658.56	Graded suevite unit	Brussels	BTS-18	X		X
76	54_1_57_59	659.51	Graded suevite unit	Vienna				X			X
77	54_1_64_66	659.58	Graded suevite unit	Brussels	BTS-19	X		X		X
78	54_1_66_68.5	659.6	Graded suevite unit	Vienna	VTS-01	X		X
79	55_1_87_89.5	662.86	Graded suevite unit	Vienna	VTS-02	X		X
80	55_2_75_77	663.95	Graded suevite unit	Brussels	BTS-20	X		X
81	55_3_8_14	664.5	Graded suevite unit	Brussels	PTS-14	X		X
82	56_1_95_97	665.99	Graded suevite unit	Brussels	BTS-21	X		X		X
83	56_1_97_99.5	666.01	Graded suevite unit	Vienna							X
84	56_2_95_97.5	667.2	Graded suevite unit	Vienna	VTS-03	X		X
85	57_1_27_29.5	668.36	Graded suevite unit	Vienna	VTS-04	X		X			X
86	57_2_105_107	670.35	Graded suevite unit	Brussels	BTS-22	X		X
87	57_2_107_109.5	670.37	Graded suevite unit	Vienna	VTS-05	X		X
88	58_1_30_32	671.44	Graded suevite unit	Brussels	BTS-23	X	X	X
89	58_3_8_10.5	673.68	Graded suevite unit	Vienna				X			X
90	59_1_52_54	674.71	Graded suevite unit	Brussels	BTS-24	X		X
91	59_2_74_76	675.91	Graded suevite unit	Brussels	BTS-25	X		X	X	X
92	59_2_76_78.5	675.93	Graded suevite unit	Vienna	VTS-06	X		X			X
93	59_3_90_92.5	677.06	Graded suevite unit	Vienna	VTS-07	X		X
94	59_3_95_97	677.11	Graded suevite unit	Vienna	VTS-08	X		X
95	60_1_10.5_13	677.345	Graded suevite unit	Brussels				X
96	60_1_45_47	677.69	Graded suevite unit	Brussels	BTS-26	X		X
97	60_1_82_84	678.06	Graded suevite unit	Brussels				X
98	61_1_7_9	678.51	Graded suevite unit	Brussels				X
99	61_1_9_11.5	678.53	Graded suevite unit	Vienna	VTS-09	X		X
100	61_2_55_57	679.64	Graded suevite unit	Brussels	BTS-27	X		X
101	62_1_31_33.5	681.85	Graded suevite unit	Vienna	VTS-10	X		X			X
102	62_1_47_49	682.01	Graded suevite unit	Brussels	BTS-28	X		X
103	62_1_49_51.5	682.03	Graded suevite unit	Vienna	VTS-11	X		X
104	63_1_7_9.5	683.41	Graded suevite unit	Vienna	VTS-12	X		X			X
105	63_1_68_70	684.02	Graded suevite unit	Vienna							X
106	63_1_70_71	684.04	Graded suevite unit	Brussels	BTS-29	X		X
107	63_2_79_81.5	685.56	Graded suevite unit	Vienna	VTS-13	X	X	X
108	64_2_8_10	687	Graded suevite unit	Brussels	BTS-30	X
109	65_1_36_38	688.27	Graded suevite unit	Brussels	BTS-31	X		X
110	65_1_38_40.5	688.29	Graded suevite unit	Vienna	VTS-14	X		X
111	67_1_13_15	690.59	Graded suevite unit	Brussels	BTS-32	X		X		X
112	67_1_15_17.5	690.61	Graded suevite unit	Vienna	VTS-15	X		X	X
113	68_1_58_60	692.04	Graded suevite unit	Brussels	BTS-33	X		X
114	69_1_71_74	693.17	Graded suevite unit	Brussels				X
115	71_1_48_50	696.57	Graded suevite unit	Brussels				X
116	72_1_35_37	697.44	Graded suevite unit	Brussels	BTS-34	X		X
117	72_1_94.5_99	698.035	Graded suevite unit	Vienna	VTS-16	X		X
118	73_1_20_23	699.29	Graded suevite unit	Vienna	VTS-17	X		X
119	73_2_100_102	700.92	Graded suevite unit	Brussels	BTS-35	X		X
120	73_2_102_104.5	700.94	Graded suevite unit	Vienna	VTS-18	X		X
121	75_1_13_16	702.17	Graded suevite unit	Vienna							X
122	76_1_117_119.5	703.56	Graded suevite unit	Vienna	VTS-19	X		X
123	77_1_15_18	703.69	Graded suevite unit	Vienna	VTS-20	X
124	78_1_76_78	704.5	Graded suevite unit	Brussels	BTS-37	X				X
125	78_1_12_16	704.86	Graded suevite unit	Vienna							X
126	80_1_43_45	705.63	Graded suevite unit	Brussels				X
127	80_2_15_19.5	706.11	Graded suevite unit	Brussels				X
128	80_2_59_61	706.55	Graded suevite unit	Brussels	BTS-38	X		X
129	80_2_61_63.5	706.57	Graded suevite unit	Vienna				X
130	80_2_126_128	707.22	Graded suevite unit	Vienna							X
131	81_1_8_10	707.42	Graded suevite unit	Vienna	VTS-21	X		X
132	81_1_67_69	708.01	Graded suevite unit	Vienna	VTS-26
133	81_2_6.5_8.5	708.575	Graded suevite unit	Brussels				X
134	81_2_54.5_59.5	709.055	Graded suevite unit	Brussels				X
135	81_2_104_108	709.55	Graded suevite unit	Brussels				X
136	81_3_30_32	710.29	Non-graded suevite unit	Brussels				X
137	81_3_32_34.5	710.31	Non-graded suevite unit	Vienna	VTS-22	X		X
138	82_1_35_38.5	710.74	Non-graded suevite unit	Vienna	VTS-23	X		X	X		X
139	83_1_70_75	712.78	Non-graded suevite unit	Brussels	QTS-16	X		X
140	83_1_115_119	713.23	Non-graded suevite unit	Brussels	QTS-17	X		X		X
141	84_2_17_19	713.71	Non-graded suevite unit	Brussels				X
142	84_2_19_21.5	713.73	Non-graded suevite unit	Vienna	VTS-24	X		X			X
143	84_3_27_29.5	715.09	Non-graded suevite unit	Vienna	VTS-25	X	X	X
144	84_3_70_72.5	715.52	Non-graded suevite unit	Brussels				X
145	84_3_104_106	715.86	Brecciated impact melt rock	Brussels				X
146	84_3_117.5_119.5	715.995	Brecciated impact melt rock	Brussels	QTS-01	X		X		X
147	85_1_33_35	716.82	Brecciated impact melt rock	Brussels	QTS-20	X		X		X
148	85_1_96_99	717.45	Brecciated impact melt rock	Brussels	QTS-21	X		X
149	86_1_9.5_11.5	717.735	Brecciated impact melt rock	Brussels	QTS-22	X		X		X
150	86_1_17_19	717.81	Brecciated impact melt rock	Brussels	BTS-39	X		X
151	86_1_19_21.5	717.83	Brecciated impact melt rock	Vienna				X			X
152	86_1_106_109	718.7	Brecciated impact melt rock	Brussels	QTS-23	X		X		X
153	86_2_36_38	719.23	Brecciated impact melt rock	Brussels				X
154	87_1_16_18	719.7	Brecciated impact melt rock	Brussels	BTS-40	X		X
155	87_1_106.5_108.5	720.605	Brecciated impact melt rock	Brussels	QTS-24	X		X
156	87_2_38_41	721.1	Brecciated impact melt rock	Brussels	QTS-02	X		X		X
157	87_2_56_58	721.28	Brecciated impact melt rock	Brussels	BTS-41	X		X		X
158	87_2_73_75	721.45	Brecciated impact melt rock	Brussels	QTS-03	X		X		X
159	87_2_87_91	721.59	Brecciated impact melt rock	Brussels	QTS-04	X		X		X
160	87_2_103.5_107	721.755	Brecciated impact melt rock	Brussels	QTS-05	X		X		X
161	88_1_12_14.5	722.71	Brecciated impact melt rock	Vienna				X			X
162	88_1_66_68	723.25	Brecciated impact melt rock	Brussels	QTS-06	X		X
163	88_2_7_9	723.81	Brecciated impact melt rock	Brussels	BTS-42	X		X		X
164	88_2_9_11.5	723.83	Brecciated impact melt rock	Vienna				X
165	88_3_45_47.5	724.93	Brecciated impact melt rock	Vienna				X
166	89_1_57_59	726.21	Brecciated impact melt rock	Brussels	BTS-43	X		X		X
167	89_1_59_61.5	726.23	Brecciated impact melt rock	Vienna				X
168	89_3_8_10	728.46	Brecciated impact melt rock	Brussels	QTS-07	X		X		X
169	90_1_85_87	729.54	Brecciated impact melt rock	Brussels	BTS-44	X		X		X
170	90_3_66_68	731.69	Brecciated impact melt rock	Brussels				X

## Sheet: S1B - Clasts
TABLE S1B. SAMPLE OVERVIEW OF SPECIFIC SUEVITE CLAST TYPES WITH ASSOCIATED ANALYTICAL TECHNIQUES THAT WERE USED
#	Sample ID	Depth (mbsf)	Main clast type	Lab	Thin section ID	Thin section µXRF	Image analysis	Thick section µXRF	EMPA	Bulk ICP-OES & ICP-MS	Bulk XRF & INAA
1	61_3_9_13	680.59	Felsic basement clast	Brussels	PTS-15	X		X
2	61_3_18_21	680.68	Reacted carbonate clast	Brussels	PTS-16	X		X
3	63_1_109_112	684.43	Microcrystalline melt clast	Brussels	PTS-17	X		X
4	63_1_137_140	684.71	Primary carbonate clast	Brussels	PTS-18	X		X
5	63_2_94_97	685.71	Microcrystalline melt clast	Brussels	PTS-19	X		X
6	64_2_84_86	687.76	Reacted carbonate clast	Brussels	PTS-20	X		X
7	65_1_81_84	688.72	Vitric and microcrystalline melt clasts, and primary carbonate clast	Brussels	PTS-21	X		X
8	65_1_109_112	689	Reacted carbonate clast	Brussels	PTS-22	X		X
9	68_1_67_70	692.13	not analyzed, part of matrix	Brussels	PTS-23	X		X
10	72_1_11_14	697.2	Microcrystalline melt clast	Brussels	PTS-24	X		X
11	72_1_21_23	697.3	Microcrystalline melt clast	Brussels	PTS-25	X		X
12	72_1_23_26	697.32	Microcrystalline melt clast	Brussels	PTS-26	X		X
13	72_1_48_51	697.57	Silica mineral clast	Brussels	PTS-27	X		X
14	72_1_74_77	697.83	Primary carbonate clast	Brussels	PTS-28	X		X
15	72_1_83_85	697.92	Primary carbonate clast	Brussels	PTS-29	X		X
16	73_1_19_21	699.28	Reacted carbonate clast and felsic basement clast	Brussels	PTS-30	X		X
17	74_1_3_7	701.67	Reacted carbonate clast and microcrystalline melt clast	Brussels	PTS-31	X		X
18	76_1_15_17	702.54	Primary carbonate clast	Brussels	BTS-36	X		X
19	76_1_75_80	703.14	Felsic basement clast	Brussels	PTS-32	X		X
20	80_1_69_72	705.89	Microcrystalline melt clast	Brussels	PTS-33	X		X
21	81_1_30_34	707.64	Reacted carbonate clast	Brussels	PTS-34	X		X
22	81_1_38_42	707.72	Microcrystalline melt clast	Brussels	PTS-35	X		X
23	82_3_15_20	711.31	Felsic basement clast	Brussels	PTS-36	X		X
24	82_4_13_15	711.57	Felsic basement clast	Brussels	PTS-37	X		X
25	84_2_17_19*	713.71	Microcrystalline melt clast	Brussels	QTS-18	X		X
26	84_2_26_29	713.8	Primary carbonate clast	Brussels	PTS-38	X		X
27	84_2_67_70	714.21	Felsic basement clast	Brussels	PTS-39	X		X
28	84_2_106,5_108,5	714.605	Silica mineral clast	Brussels	QTS19	X		X		X
29	84_2_124_126	714.78	Microcrystalline melt clast	Brussels	PTS-40	X		X
30	85_1_96_99	717.45	Felsic basement clast	Brussels	QTS-21	X		X
31	87_2_15_19	720.87	Felsic basement clast	Brussels	PTS-41	X		X
32	87_2_17_19	720.89	Silica mineral clast	Brussels	QTS-25	X		X
*Sample 84_2_17_19 was used both for clast analysis and bulk analysis.
